# Supplementary material for: Ceria–zirconia modified MnOx catalysts for gaseous elemental mercury oxidation and adsorption
Source: Royal Society of Chemistry journal article supplement (doi:10.1039/c5cy01534k), 2015-10-19
Supplement: c5cy01534k1.pdf [file c5cy01534k1.pdf]

## **Ceria-zirconia modified MnO<sub>x</sub> catalysts for gaseous elemental mercury oxidation and adsorption**

**Deshetti Jampaiah<sup>a,b</sup>, Samuel J. Ippolito<sup>b</sup>, Ylias M. Sabri<sup>b</sup>, James Tardio<sup>b</sup>, P. R. Selvakannan<sup>b</sup>, Ayman Nafady<sup>c,d</sup>, Benjaram M. Reddy<sup>a,\*</sup> and Suresh K. Bhargava<sup>b,\*</sup>**

*<sup>a</sup>RMIT-IICT Joint Research Centre, CSIR-Indian Institute of Chemical Technology, Uppal Road, Hyderabad – 500 607, India*

*<sup>b</sup>Centre for Advanced Materials & Industrial Chemistry (CAMIC), School of Applied Sciences, RMIT University, GPO BOX 2476, Melbourne – 3001, Australia*

*<sup>c</sup>Chemistry Department, College of Science, King Saud University, Riyadh, Saudi Arabia*

*<sup>d</sup>Chemistry Department, Faculty of Science, Sohag University, Sohag 82524, Egypt*

**\*Corresponding Authors**

E-mail: [bmreddy@iict.res.in](mailto:bmreddy@iict.res.in); Fax: +91 40 2716 0921; Tel: +91 40 27193510

E-mail: [suresh.bhargava@rmit.edu.in](mailto:suresh.bhargava@rmit.edu.in); Tel: +61 3 9925 3365

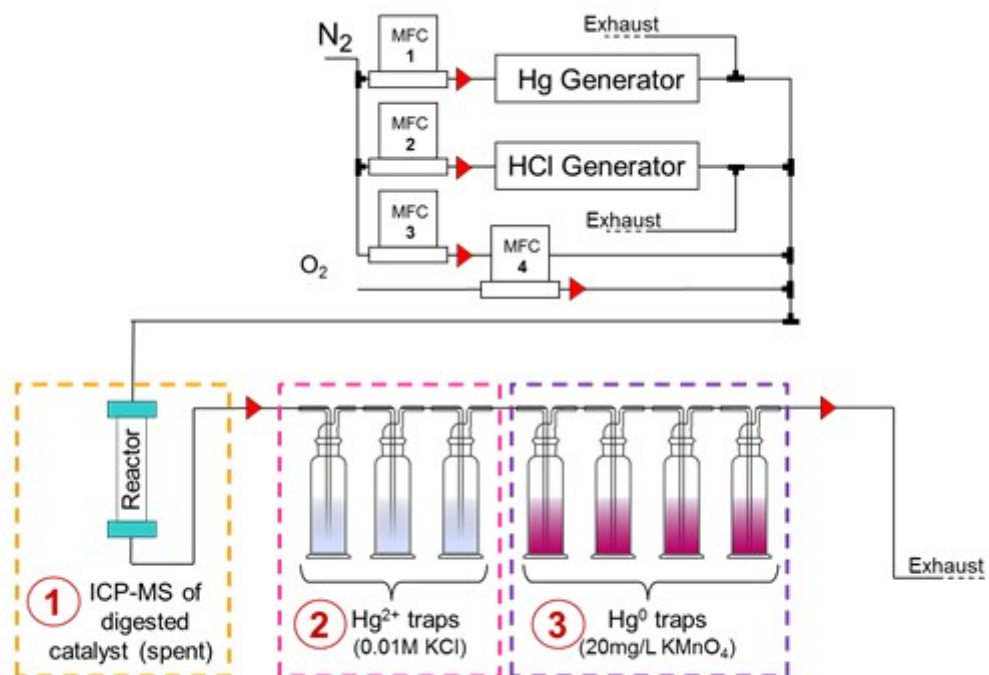

Fig. S1. Schematic diagram of experimental setup.

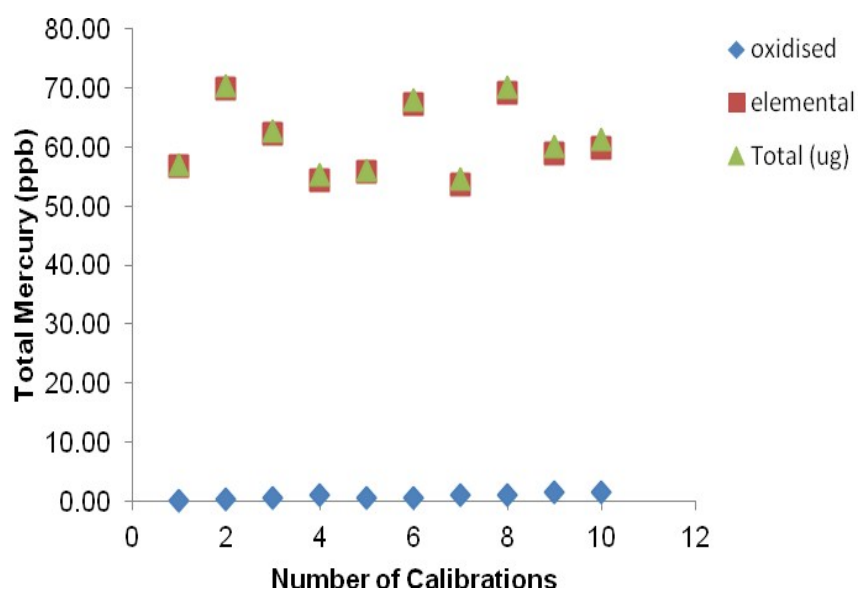

**Fig. S2** The calibration experiments for total amount of inlet mercury ( $\text{Hg}^0_{\text{inlet}}$ ).

**Table S1**  $\text{H}_2$  consumption values of  $\text{CeO}_2\text{-ZrO}_2$  (CZ),  $\text{MnO}_x/\text{CeO}_2$  (Mn/Ce),  $\text{MnO}_x/\text{ZrO}_2$  (Mn/Zr), and 15%  $\text{MnO}_x/\text{CeO}_2\text{-ZrO}_2$  (15Mn/CZ) catalysts.

| Sample  | H <sub>2</sub> consumption (μmol/g) |     |     | Total |
|---------|-------------------------------------|-----|-----|-------|
|         | T1                                  | T2  | T3  |       |
| CZ      | 723                                 | 212 | -   | 935   |
| Mn/Ce   | 85                                  | 187 | 326 | 598   |
| Mn/Zr   | 102                                 | 338 | -   | 440   |
| 15Mn/CZ | 843                                 | 346 | 84  | 1273  |
